# Supplementary material for: Profile of Phosphatidylserine Modifications under Nitroxidative Stress Conditions Using a Liquid Chromatography-Mass Spectrometry Based Approach
Source: PubMed Central journal article supplement (PMC6337642; doi:10.3390/molecules24010107), 2018-12-29
Supplement: molecules-24-00107-s001.pdf [file molecules-24-00107-s001.pdf]

# Profile of Phosphatidylserine Modifications under Nitroxidative Stress Conditions Using a Liquid Chromatography-Mass Spectrometry Based Approach

Bruna Neves <sup>1</sup>, Pedro Domingues <sup>1</sup>, Maria Manuel Oliveira <sup>2</sup>, Maria do Rosário Domingues <sup>1,3</sup> and Tânia Melo <sup>1,\*</sup>

<sup>1</sup> Mass Spectrometry Centre, UI QOPNA, Chemistry Department, University of Aveiro, 3810-193 Aveiro, Portugal; brunafneves@gmail.com (B.N.); p.domingues@ua.pt (P.D.); mrd@ua.pt (M.R.D.)

<sup>2</sup> Chemistry Department, University of Trás-os-Montes e Alto Douro, 5000-801 Vila Real, Portugal; mmso@utad.pt

<sup>3</sup> Biology Department & CESAM & ECOMARE, University of Aveiro, 3810-193 Aveiro, Portugal

\* Correspondence: [taniamel@ua.pt](mailto:taniamel@ua.pt); Tel.: +351 23508

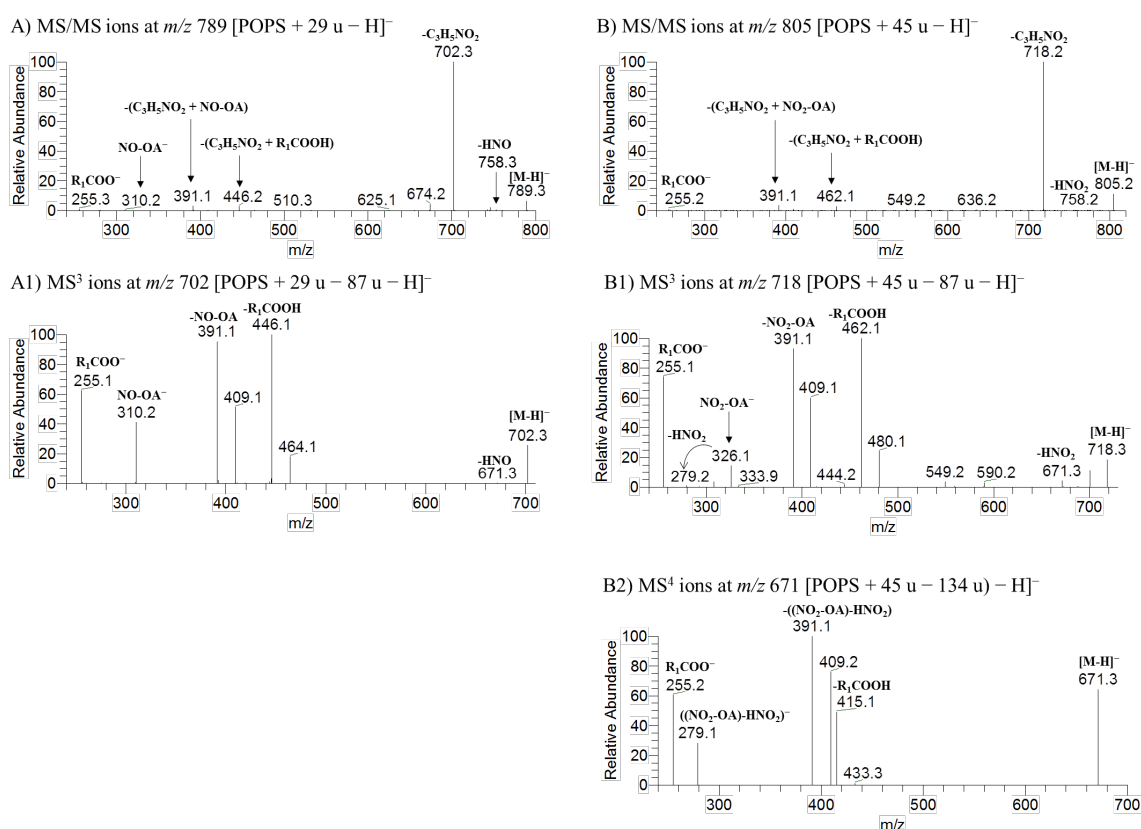

**Figure S1.** ESI-MS/MS spectra obtained in Linear Ion Trap of the  $[M - H]^-$  ions at  $m/z$  789.3 corresponding to  $[POPS + 29 u - H]^-$  (A), and at  $m/z$  805.2 corresponding to  $[POPS + 45 u - H]^-$  (B). MS<sup>3</sup> of ions at  $m/z$  702.3 (A1) and  $m/z$  718.3 (B1) that correspond, respectively, to  $[POPS + 29 u - 87 u - H]^-$  and  $[POPS + 45 u - 87 u - H]^-$  were also shown.

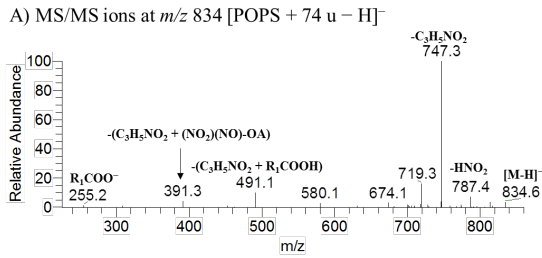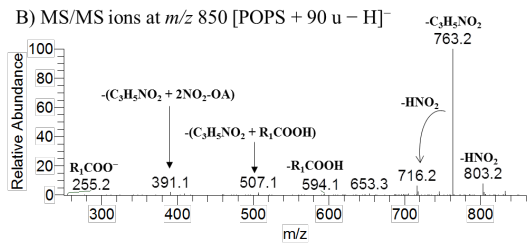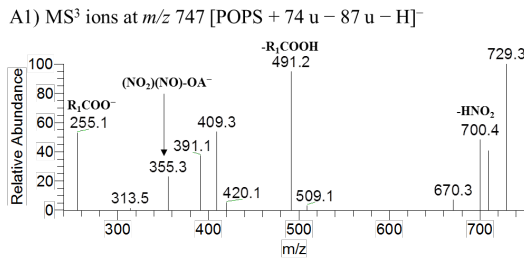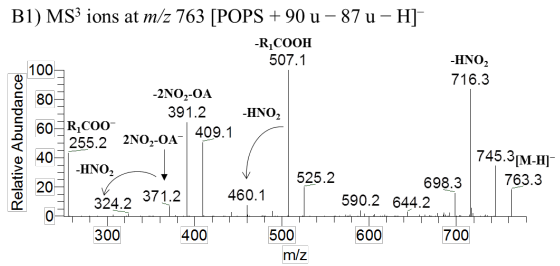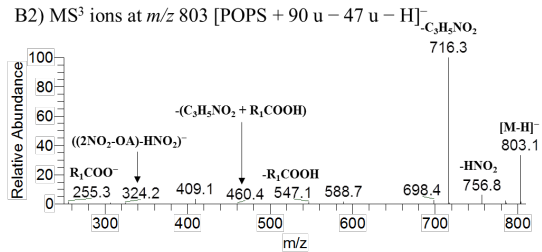

**Figure S2.** ESI-MS/MS spectra obtained in Linear Ion Trap of  $[M - H]^-$  ions at  $m/z$  834.6 corresponding to  $[POPS + 74 u - H]^-$  (A), and at  $m/z$  850.3 corresponding to  $[POPS + 90 u - H]^-$  (B). MS<sup>3</sup> of ions at  $m/z$  747.3 (A1) assigned as  $[POPS + 74 u - 87 u - H]^-$ , at  $m/z$  763.3 (B1) that correspond to  $[POPS + 90 u - 87 u - H]^-$ , and at  $m/z$  803.1 attributed to  $[POPS + 90 u - HNO_2 - H]^-$  were also shown.

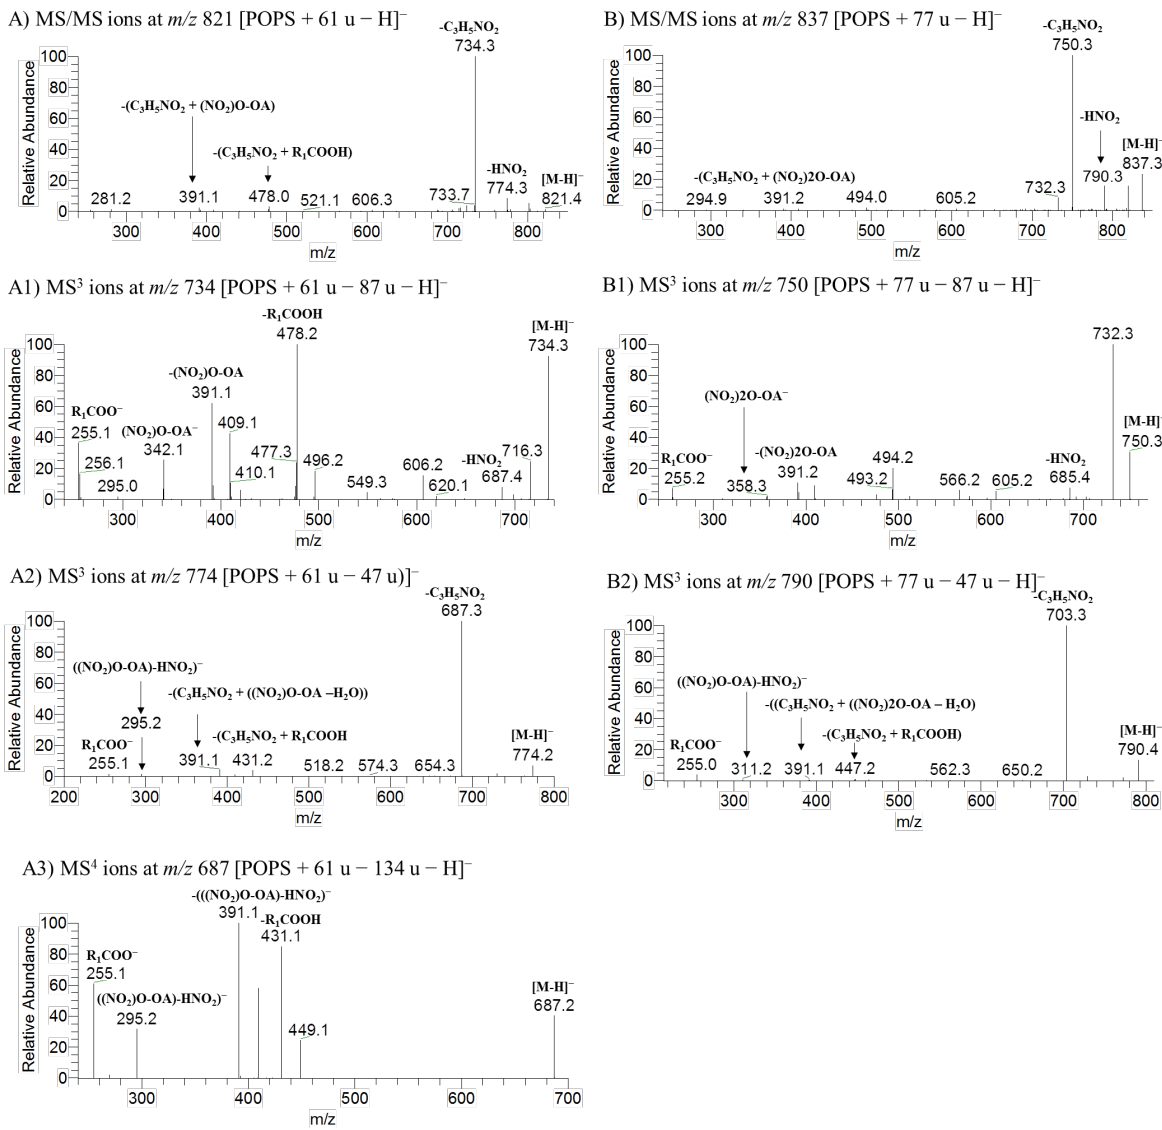

**Figure S3.** ESI-MS/MS spectra obtained in Linear Ion Trap of  $[M - H]^-$  ions at  $m/z$  821.4 corresponding to  $[POPS + 61 u - H]^-$  (A), and at  $m/z$  837.3 corresponding to  $[POPS + 77 u - H]^-$  (B). MS<sup>3</sup> of ions at  $m/z$  734.3 (A1) assigned as  $[POPS + 61 u - 87 u - H]^-$ , and at  $m/z$  750.3 (B1) assigned as  $[POPS + 77 u - 87 u - H]^-$  were also shown.

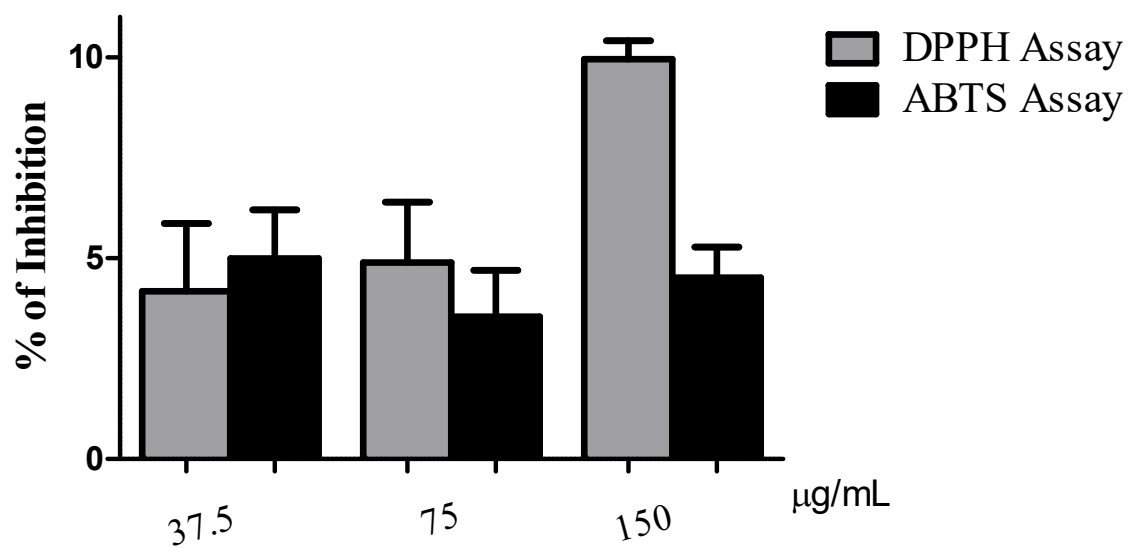

**Figure S4.** Percentage of inhibition of DPPH• and ABTS•+ radicals obtained in the presence of non-modified POPS (37.5, 75 and 150 µg/mL) after 120 min of reaction.
